# Supplementary material
Source: PubMed Central journal article supplement (PMC5738979)
Supplement: ba002311-suppl1.pdf [file ba002311-suppl1.pdf]

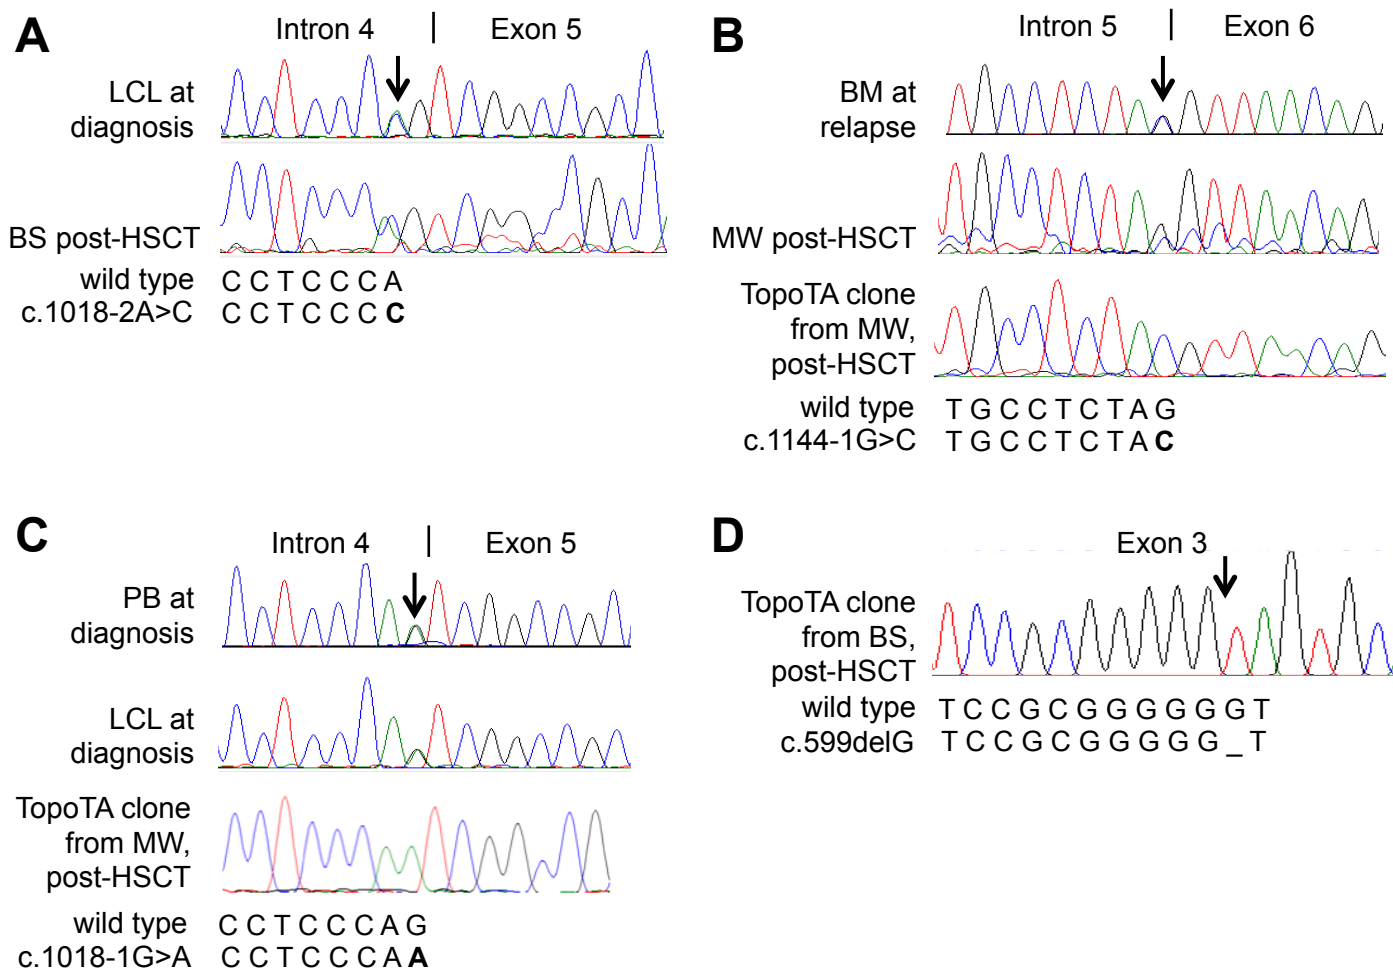

**Supplementary Figure 1: Spectrum of identified *GATA2* mutations.**

Sequence chromatograms of the germline splice site mutations (A-C) and single nucleotide deletion (D) identified in our cohort (denoted by arrows) from peripheral blood (PB), lymphoblastoid cell line (LCL), bone marrow (BM), buccal swab (BS), or mouthwash (MW) samples as indicated. Panel A shows the splice site mutation c.1018-2A>C in BMF67 from LCL at diagnosis and BS after HSCT. Panel B shows the splice site mutation c.1144-1G>C in BMF109 from BM at relapse (diagnostic sample not available) and MW after HSCT. Panel C shows the splice site mutation c.1018-1G>A in BMF41 from both PB and LCL at diagnosis and from MW after HSCT. Panel D shows the single-base deletion c.599delG resulting in a frameshift (p.G200VfsX18) in BMF129 from BS after HSCT. For this patient, clinical genetic testing performed by *GeneDx* ([www.genedx.com](http://www.genedx.com)) demonstrated the same mutation at the time of initial diagnosis. All exonic and intronic designations are based on the RefSeq transcript NM\_032368.

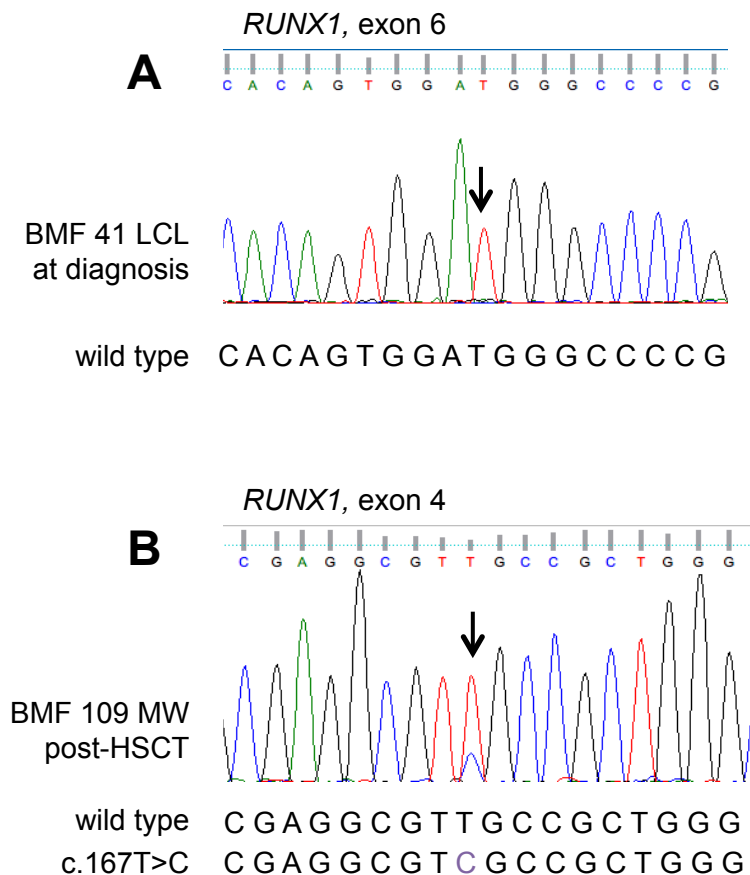

**Supplementary Figure 2: *RUNX1* mutations detected by next generation sequencing panel.**

Panel A shows no evidence of the *RUNX1* c.593A>G, p.D198G mutation in DNA from a lymphoblastoid cell line (LCL) generated from BMF41 at diagnosis, consistent with the mutation observed by next-generation sequencing being somatic. Panel B shows the presence of the mutant *RUNX1* c.167T>C, p.L56S, allele in DNA from a mouthwash sample (MW) post-HSCT from BMF109, suggesting that the mutation detected by next-generation sequencing was in fact germline. The disproportionate peak heights likely reflect contamination of the native epithelial cells with donor-derived lymphocytes. Exon designations are based on RefSeq transcript NM\_001754.4.

**Supplemental Table 1: Genomic regions targeted by next-generation sequencing panel**

| Gene           | RefSeq Transcript | Chr | Chr:start   | Chr:stop    | BP Covered | Exon | AA:start | AA:stop |
|----------------|-------------------|-----|-------------|-------------|------------|------|----------|---------|
| <i>ANKRD26</i> | NM_014915         | 10  | 27,389,004  | 27,389,455  | 451        | 1    | -c.200   | 81      |
| <i>ANKRD26</i> | NM_014915         | 10  | 27,382,606  | 27,382,738  | 132        | 2    | 82       | 119     |
| <i>ASXL1</i>   | NM_015338         | 20  | 31,022,175  | 31,025,175  | 3000       | 12   | 574      | 1542    |
| <i>BRAF</i>    | NM_004333         | 7   | 140,481,366 | 140,481,503 | 137        | 11   | 439      | 477     |
| <i>BRAF</i>    | NM_004333         | 7   | 140,453,060 | 140,453,246 | 186        | 15   | 581      | 620     |
| <i>CALR</i>    | NM_004343         | 19  | 13,054,517  | 13,054,737  | 220        | 9    | 352      | 418     |
| <i>CEPBA</i>   | NM_004364         | 19  | 33,792,030  | 33,793,590  | 1560       | 1    | 1        | 359     |
| <i>CNOT3</i>   | NM_014516         | 19  | 54,646,705  | 54,646,749  | 44         | 2    | 1        | 9       |
| <i>CNOT3</i>   | NM_014516         | 19  | 54,647,386  | 54,647,495  | 109        | 3    | 57       | 86      |
| <i>CNOT3</i>   | NM_014516         | 19  | 54,647,963  | 54,648,078  | 115        | 4    | 130      | 161     |
| <i>CREBBP</i>  | NM_004380         | 16  | 3,929,823   | 3,929,927   | 104        | 16   | 1        | 28      |
| <i>CREBBP</i>  | NM_004380         | 16  | 3,828,002   | 3,828,193   | 191        | 16   | 648      | 705     |
| <i>CREBBP</i>  | NM_004380         | 16  | 3,827,604   | 3,827,668   | 64         | 16   | 706      | 720     |
| <i>CREBBP</i>  | NM_004380         | 16  | 3,824,560   | 3,824,704   | 144        | 16   | 721      | 761     |
| <i>CREBBP</i>  | NM_004380         | 16  | 3,823,742   | 3,823,940   | 198        | 16   | 762      | 821     |
| <i>CREBBP</i>  | NM_004380         | 16  | 3,820,561   | 3,820,997   | 436        | 16   | 822      | 960     |
| <i>CREBBP</i>  | NM_004380         | 16  | 3,819,165   | 3,819,364   | 199        | 16   | 961      | 1020    |
| <i>CREBBP</i>  | NM_004380         | 16  | 3,817,711   | 3,817,920   | 209        | 16   | 1021     | 1083    |
| <i>CREBBP</i>  | NM_004380         | 16  | 3,808,845   | 3,808,983   | 138        | 16   | 1084     | 1123    |
| <i>CREBBP</i>  | NM_004380         | 16  | 3,807,800   | 3,808,059   | 259        | 16   | 1124     | 1203    |
| <i>CREBBP</i>  | NM_004380         | 16  | 3,807,279   | 3,807,387   | 108        | 16   | 1204     | 1233    |
| <i>CREBBP</i>  | NM_004380         | 16  | 3,900,288   | 3,901,020   | 732        | 16   | 29       | 266     |
| <i>CREBBP</i>  | NM_004380         | 16  | 3,801,717   | 3,801,817   | 100        | 16   | 1234     | 1260    |
| <i>CREBBP</i>  | NM_004380         | 16  | 3,799,618   | 3,799,694   | 76         | 16   | 1261     | 1279    |
| <i>CREBBP</i>  | NM_004380         | 16  | 3,795,268   | 3,795,365   | 97         | 16   | 1279     | 1305    |
| <i>CREBBP</i>  | NM_004380         | 16  | 3,794,885   | 3,794,972   | 87         | 16   | 1306     | 1328    |
| <i>CREBBP</i>  | NM_004380         | 16  | 3,790,390   | 3,790,560   | 170        | 16   | 1329     | 1378    |
| <i>CREBBP</i>  | NM_004380         | 16  | 3,789,569   | 3,789,735   | 166        | 16   | 1379     | 1426    |
| <i>CREBBP</i>  | NM_004380         | 16  | 3,788,550   | 3,788,683   | 133        | 16   | 1427     | 1465    |
| <i>CREBBP</i>  | NM_004380         | 16  | 3,786,641   | 3,786,826   | 185        | 16   | 1466     | 1520    |
| <i>CREBBP</i>  | NM_004380         | 16  | 3,786,027   | 3,786,214   | 187        | 16   | 1521     | 1576    |
| <i>CREBBP</i>  | NM_004380         | 16  | 3,781,767   | 3,781,948   | 181        | 16   | 1577     | 1630    |
| <i>CREBBP</i>  | NM_004380         | 16  | 3,860,594   | 3,860,790   | 196        | 16   | 267      | 325     |
| <i>CREBBP</i>  | NM_004380         | 16  | 3,781,183   | 3,781,484   | 301        | 16   | 1631     | 1724    |
| <i>CREBBP</i>  | NM_004380         | 16  | 3,777,709   | 3,779,885   | 2176       | 16   | 1725     | 2443    |
| <i>CREBBP</i>  | NM_004380         | 16  | 3,843,377   | 3,843,637   | 260        | 16   | 326      | 406     |
| <i>CREBBP</i>  | NM_004380         | 16  | 3,841,972   | 3,842,105   | 133        | 16   | 407      | 443     |
| <i>CREBBP</i>  | NM_004380         | 16  | 3,832,675   | 3,832,937   | 262        | 16   | 444      | 525     |
| <i>CREBBP</i>  | NM_004380         | 16  | 3,831,195   | 3,831,317   | 122        | 16   | 526      | 559     |
| <i>CREBBP</i>  | NM_004380         | 16  | 3,830,723   | 3,830,889   | 166        | 16   | 560      | 608     |
| <i>CREBBP</i>  | NM_004380         | 16  | 3,828,691   | 3,828,828   | 137        | 16   | 609      | 647     |
| <i>CRLF2</i>   | NM_022418         | X   | 1,331,439   | 1,331,537   | 98         | 1    | 1        | 27      |
| <i>CRLF2</i>   | NM_022418         | X   | 1,327,689   | 1,327,811   | 122        | 2    | 28       | 61      |
| <i>CRLF2</i>   | NM_022418         | X   | 1,325,316   | 1,325,502   | 186        | 3    | 62       | 117     |
| <i>CRLF2</i>   | NM_022418         | X   | 1,321,255   | 1,321,436   | 181        | 4    | 118      | 161     |
| <i>CRLF2</i>   | NM_022418         | X   | 1,317,409   | 1,317,591   | 182        | 5    | 162      | 216     |

|               |           |    |             |             |     |       |     |     |
|---------------|-----------|----|-------------|-------------|-----|-------|-----|-----|
| <i>CRLF2</i>  | NM_022418 | X  | 1,314,880   | 1,315,024   | 144 | 6     | 217 | 256 |
| <i>CSFR1</i>  | NM_005211 | 5  | 149,433,622 | 149,433,796 | 174 | 22    | 922 | 973 |
| <i>DNMT3A</i> | NM_175629 | 2  | 25,469,019  | 25,469,188  | 169 | 11    | 427 | 476 |
| <i>DNMT3A</i> | NM_175629 | 2  | 25,468,879  | 25,468,943  | 64  | 12    | 477 | 491 |
| <i>DNMT3A</i> | NM_175629 | 2  | 25,468,112  | 25,468,211  | 99  | 13    | 492 | 518 |
| <i>DNMT3A</i> | NM_175629 | 2  | 25,467,399  | 25,467,531  | 132 | 14    | 519 | 555 |
| <i>DNMT3A</i> | NM_175629 | 2  | 25,467,014  | 25,467,217  | 203 | 15    | 556 | 617 |
| <i>DNMT3A</i> | NM_175629 | 2  | 25,466,757  | 25,466,861  | 104 | 16    | 618 | 645 |
| <i>DNMT3A</i> | NM_175629 | 2  | 25,464,421  | 25,464,586  | 165 | 17    | 646 | 694 |
| <i>DNMT3A</i> | NM_175629 | 2  | 25,463,499  | 25,463,609  | 110 | 18    | 695 | 724 |
| <i>DNMT3A</i> | NM_175629 | 2  | 25,463,161  | 25,463,329  | 168 | 19    | 725 | 774 |
| <i>DNMT3A</i> | NM_175629 | 2  | 25,461,989  | 25,462,094  | 105 | 20    | 775 | 803 |
| <i>DNMT3A</i> | NM_175629 | 2  | 25,459,795  | 25,459,884  | 89  | 21    | 804 | 826 |
| <i>DNMT3A</i> | NM_175629 | 2  | 25,458,566  | 25,458,704  | 138 | 22    | 827 | 866 |
| <i>DNMT3A</i> | NM_175629 | 2  | 25,457,138  | 25,457,299  | 161 | 23    | 867 | 913 |
| <i>DNMT3A</i> | NM_175629 | 2  | 25,505,240  | 25,505,654  | 414 | 4     | 60  | 149 |
| <i>DNMT3A</i> | NM_175629 | 2  | 25,470,450  | 25,470,628  | 178 | 8     | 286 | 338 |
| <i>ETV6</i>   | NM_001987 | 12 | 11,803,052  | 11,803,104  | 52  | 1     | 1   | 11  |
| <i>ETV6</i>   | NM_001987 | 12 | 11,905,374  | 11,905,523  | 149 | 2     | 12  | 55  |
| <i>ETV6</i>   | NM_001987 | 12 | 11,992,064  | 11,992,248  | 184 | 3     | 56  | 110 |
| <i>ETV6</i>   | NM_001987 | 12 | 12,006,351  | 12,006,505  | 154 | 4     | 111 | 155 |
| <i>ETV6</i>   | NM_001987 | 12 | 12,022,348  | 12,022,913  | 565 | 5     | 156 | 337 |
| <i>ETV6</i>   | NM_001987 | 12 | 12,037,369  | 12,037,531  | 162 | 6     | 338 | 384 |
| <i>ETV6</i>   | NM_001987 | 12 | 12,038,850  | 12,038,970  | 120 | 7     | 385 | 418 |
| <i>ETV6</i>   | NM_001987 | 12 | 12,043,865  | 12,043,990  | 125 | 8     | 419 | 453 |
| <i>EZH2</i>   | NM_004456 | 7  | 148,544,264 | 148,544,400 | 136 | 1     | 1   | 39  |
| <i>EZH2</i>   | NM_004456 | 7  | 148,514,304 | 148,514,493 | 189 | 11    | 414 | 470 |
| <i>EZH2</i>   | NM_004456 | 7  | 148,513,766 | 148,513,880 | 114 | 12    | 471 | 488 |
| <i>EZH2</i>   | NM_004456 | 7  | 148,512,588 | 148,512,648 | 60  | 13    | 489 | 502 |
| <i>EZH2</i>   | NM_004456 | 7  | 148,511,996 | 148,512,141 | 145 | 14    | 503 | 544 |
| <i>EZH2</i>   | NM_004456 | 7  | 148,511,041 | 148,511,239 | 198 | 15    | 545 | 617 |
| <i>EZH2</i>   | NM_004456 | 7  | 148,508,707 | 148,508,822 | 115 | 16    | 618 | 635 |
| <i>EZH2</i>   | NM_004456 | 7  | 148,507,415 | 148,507,516 | 101 | 17    | 636 | 662 |
| <i>EZH2</i>   | NM_004456 | 7  | 148,506,392 | 148,506,492 | 100 | 18    | 663 | 704 |
| <i>EZH2</i>   | NM_004456 | 7  | 148,506,153 | 148,506,257 | 104 | 19    | 705 | 732 |
| <i>EZH2</i>   | NM_004456 | 7  | 148,504,728 | 148,504,808 | 80  | 20    | 733 | 752 |
| <i>FBXW7</i>  | NM_033632 | 4  | 153,247,148 | 153,247,393 | 245 | 10    | 473 | 548 |
| <i>FBXW7</i>  | NM_033632 | 4  | 153,245,326 | 153,245,556 | 230 | 11    | 549 | 618 |
| <i>FBXW7</i>  | NM_033632 | 4  | 153,244,023 | 153,244,311 | 288 | 12    | 619 | 708 |
| <i>FBXW7</i>  | NM_033632 | 4  | 153,253,738 | 153,253,881 | 143 | 6     | 288 | 328 |
| <i>FBXW7</i>  | NM_033632 | 4  | 153,251,874 | 153,252,030 | 156 | 7     | 329 | 374 |
| <i>FBXW7</i>  | NM_033632 | 4  | 153,250,814 | 153,250,947 | 133 | 8     | 375 | 412 |
| <i>FBXW7</i>  | NM_033632 | 4  | 153,249,350 | 153,249,551 | 201 | 9     | 413 | 472 |
| <i>FLT3</i>   | NM_000419 | 13 | 28,608,014  | 28,608,361  | 347 | 14,15 | 569 | 647 |
| <i>FLT3</i>   | NM_000419 | 13 | 28,592,594  | 28,592,736  | 142 | 20    | 813 | 847 |
| <i>GATA1</i>  | NM_002049 | X  | 48,649,507  | 48,649,746  | 239 | 2     | 1   | 74  |
| <i>GATA1</i>  | NM_002049 | X  | 48,650,241  | 48,650,638  | 397 | 3     | 75  | 200 |
| <i>GATA2</i>  | NM_032638 | 3  | 128,205,636 | 128,205,929 | 293 | 2     | 1   | 77  |
| <i>GATA2</i>  | NM_032638 | 3  | 128,204,560 | 128,205,212 | 652 | 3     | 78  | 291 |

|       |           |    |             |             |     |    |     |     |
|-------|-----------|----|-------------|-------------|-----|----|-----|-----|
| GATA2 | NM_032638 | 3  | 128,202,693 | 128,202,858 | 165 | 4  | 292 | 339 |
| GATA2 | NM_032638 | 3  | 128,200,617 | 128,200,849 | 232 | 5  | 340 | 381 |
| GATA2 | NM_032638 | 3  | 128,199,852 | 128,200,171 | 319 | 6  | 382 | 481 |
| GATA3 | NM_002501 | 10 | 8,105,949   | 8,106,111   | 162 | 4  | 260 | 307 |
| GATA3 | NM_002501 | 10 | 8,111,426   | 8,111,571   | 145 | 5  | 308 | 349 |
| IDH1  | NM_005896 | 2  | 209113059   | 209113288   | 229 | 4  | 74  | 138 |
| IDH2  | NM_002168 | 15 | 90,631,756  | 90,631,996  | 240 | 4  | 125 | 178 |
| IKZF1 | NM_006060 | 7  | 50,358,648  | 50,358,707  | 59  | 2  | 1   | 14  |
| IKZF1 | NM_006060 | 7  | 50,367,224  | 50,367,363  | 139 | 3  | 15  | 54  |
| IKZF1 | NM_006060 | 7  | 50,444,221  | 50,444,501  | 280 | 4  | 55  | 141 |
| IKZF1 | NM_006060 | 7  | 50,450,228  | 50,450,415  | 187 | 5  | 142 | 197 |
| IKZF1 | NM_006060 | 7  | 50,455,033  | 50,455,178  | 145 | 6  | 198 | 239 |
| IKZF1 | NM_006060 | 7  | 50,459,417  | 50,459,571  | 154 | 7  | 239 | 284 |
| IKZF1 | NM_006060 | 7  | 50,467,606  | 50,468,333  | 727 | 8  | 285 | 520 |
| IL7R  | NM_002185 | 5  | 35,874,531  | 35,874,664  | 133 | 6  | 236 | 267 |
| JAK1  | NM_002227 | 1  | 65,321,182  | 65,321,391  | 209 | 11 | 488 | 550 |
| JAK1  | NM_002227 | 1  | 65,316,477  | 65,316,603  | 126 | 12 | 551 | 585 |
| JAK1  | NM_002227 | 1  | 65,313,205  | 65,313,368  | 163 | 13 | 586 | 633 |
| JAK1  | NM_002227 | 1  | 65,312,322  | 65,312,429  | 107 | 14 | 634 | 663 |
| JAK1  | NM_002227 | 1  | 65,311,186  | 65,311,333  | 147 | 15 | 664 | 705 |
| JAK1  | NM_002227 | 1  | 65,310,427  | 65,310,582  | 155 | 16 | 706 | 751 |
| JAK1  | NM_002227 | 1  | 65,306,918  | 65,307,032  | 114 | 19 | 852 | 883 |
| JAK1  | NM_002227 | 1  | 65,305,276  | 65,305,488  | 212 | 20 | 884 | 947 |
| JAK2  | NM_004972 | 9  | 5,069,915   | 5,070,062   | 147 | 12 | 506 | 547 |
| JAK2  | NM_004972 | 9  | 5,073,688   | 5,073,795   | 107 | 14 | 593 | 620 |
| JAK2  | NM_004972 | 9  | 5,078,296   | 5,078,455   | 159 | 16 | 665 | 710 |
| JAK3  | NM_000215 | 19 | 17,949,062  | 17,949,209  | 147 | 11 | 481 | 523 |
| JAK3  | NM_000215 | 19 | 17,948,731  | 17,948,882  | 151 | 12 | 524 | 567 |
| JAK3  | NM_000215 | 19 | 17,947,928  | 17,948,032  | 104 | 13 | 568 | 595 |
| JAK3  | NM_000215 | 19 | 17,946,723  | 17,946,870  | 147 | 14 | 596 | 638 |
| JAK3  | NM_000215 | 19 | 17,945,882  | 17,946,034  | 152 | 15 | 639 | 682 |
| JAK3  | NM_000215 | 19 | 17,945,651  | 17,945,822  | 171 | 16 | 683 | 733 |
| KIT   | NM_000222 | 4  | 55,593,374  | 55,593,500  | 126 | 10 | 514 | 549 |
| KIT   | NM_000222 | 4  | 55,593,572  | 55,593,718  | 146 | 11 | 550 | 592 |
| KIT   | NM_000222 | 4  | 55,593,979  | 55,594,103  | 124 | 12 | 593 | 626 |
| KIT   | NM_000222 | 4  | 55,594,167  | 55,594,297  | 130 | 13 | 627 | 663 |
| KIT   | NM_000222 | 4  | 55,595,491  | 55,595,661  | 170 | 14 | 664 | 709 |
| KIT   | NM_000222 | 4  | 55,597,484  | 55,597,595  | 111 | 15 | 710 | 745 |
| KIT   | NM_000222 | 4  | 55,598,027  | 55,598,174  | 147 | 16 | 746 | 787 |
| KIT   | NM_000222 | 4  | 55,599,226  | 55,599,368  | 142 | 17 | 788 | 828 |
| KIT   | NM_000222 | 4  | 55,602,654  | 55,602,785  | 131 | 18 | 829 | 865 |
| KIT   | NM_000222 | 4  | 55,602,877  | 55,602,996  | 119 | 19 | 866 | 899 |
| KIT   | NM_000222 | 4  | 55561668    | 55561957    | 289 | 2  | 23  | 112 |
| KIT   | NM_000222 | 4  | 55,603,331  | 55,603,456  | 125 | 20 | 900 | 934 |
| KIT   | NM_000222 | 4  | 55,604,585  | 55,604,733  | 148 | 21 | 935 | 973 |
| KIT   | NM_000222 | 4  | 55,575,580  | 55,575,715  | 135 | 7  | 373 | 411 |
| KIT   | NM_000222 | 4  | 55,589,740  | 55,589,874  | 134 | 8  | 412 | 448 |
| KIT   | NM_000222 | 4  | 55,592,013  | 55,592,226  | 213 | 9  | 449 | 513 |
| KRAS  | NM_033360 | 12 | 25,398,198  | 25,398,328  | 130 | 2  | 1   | 37  |

|        |           |    |             |             |      |    |      |      |
|--------|-----------|----|-------------|-------------|------|----|------|------|
| KRAS   | NM_033360 | 12 | 25,380,158  | 25,380,356  | 198  | 3  | 38   | 96   |
| KRAS   | NM_033360 | 12 | 25,378,538  | 25,378,717  | 179  | 4  | 97   | 150  |
| KRAS   | NM_033360 | 12 | 25,368,361  | 25,368,504  | 143  | 5  | 151  | 190  |
| MPL    | NM_005373 | 1  | 43,814,924  | 43,815,040  | 116  | 10 | 490  | 522  |
| MYD88  | NM_002468 | 3  | 38,182,613  | 38,182,787  | 174  | 5  | 259  | 310  |
| NOTCH1 | NM_017617 | 9  | 139,399,115 | 139,399,566 | 451  | 26 | 1529 | 1673 |
| NOTCH1 | NM_017617 | 9  | 139,397,624 | 139,397,792 | 168  | 27 | 1674 | 1722 |
| NOTCH1 | NM_017617 | 9  | 139,396,714 | 139,396,950 | 236  | 28 | 1723 | 1795 |
| NOTCH1 | NM_017617 | 9  | 139,396,443 | 139,396,550 | 107  | 29 | 1796 | 1824 |
| NOTCH1 | NM_017617 | 9  | 139,396,190 | 139,396,375 | 185  | 30 | 1825 | 1879 |
| NOTCH1 | NM_017617 | 9  | 139,394,994 | 139,395,289 | 295  | 31 | 1880 | 1978 |
| NOTCH1 | NM_017617 | 9  | 139,393,554 | 139,393,721 | 167  | 32 | 1979 | 2027 |
| NOTCH1 | NM_017617 | 9  | 139,393,341 | 139,393,458 | 117  | 33 | 2028 | 2060 |
| NOTCH1 | NM_017617 | 9  | 139,390,513 | 139,392,020 | 1507 | 34 | 2061 | 2556 |
| NPM1   | NM_002520 | 5  | 170,834,694 | 170,834,788 | 94   | 10 | 258  | 282  |
| NPM1   | NM_002520 | 5  | 170837478   | 170837800   | 322  | 11 | 283  | 372  |
| NPM1   | NM_002520 | 5  | 170,827,833 | 170,827,939 | 106  | 8  | 195  | 223  |
| NPM1   | NM_002520 | 5  | 170,832,296 | 170,832,417 | 121  | 9  | 224  | 257  |
| NRAS   | NM_002524 | 1  | 115,258,661 | 115,258,791 | 130  | 2  | 1    | 37   |
| NRAS   | NM_002524 | 1  | 115,256,411 | 115,256,609 | 198  | 3  | 38   | 96   |
| NRAS   | NM_002524 | 1  | 115,252,180 | 115,252,359 | 179  | 4  | 97   | 150  |
| NRAS   | NM_002524 | 1  | 115,251,142 | 115,251,285 | 143  | 5  | 151  | 190  |
| NT5C2  | NM_012229 | 10 | 104,858,678 | 104,858,751 | 73   | 10 | 212  | 229  |
| NT5C2  | NM_012229 | 10 | 104,857,038 | 104,857,141 | 103  | 11 | 230  | 257  |
| NT5C2  | NM_012229 | 10 | 104,855,686 | 104,855,747 | 61   | 12 | 258  | 271  |
| NT5C2  | NM_012229 | 10 | 104,854,095 | 104,854,222 | 127  | 13 | 272  | 307  |
| NT5C2  | NM_012229 | 10 | 104,853,719 | 104,853,805 | 86   | 14 | 308  | 330  |
| NT5C2  | NM_012229 | 10 | 104,852,886 | 104,853,076 | 190  | 15 | 331  | 386  |
| NT5C2  | NM_012229 | 10 | 104,851,311 | 104,851,382 | 71   | 16 | 387  | 404  |
| NT5C2  | NM_012229 | 10 | 104,850,683 | 104,850,763 | 80   | 17 | 405  | 424  |
| NT5C2  | NM_012229 | 10 | 104,850,358 | 104,850,554 | 196  | 18 | 425  | 483  |
| NT5C2  | NM_012229 | 10 | 104,849,419 | 104,849,675 | 256  | 19 | 484  | 562  |
| NT5C2  | NM_012229 | 10 | 104,934,605 | 104,934,725 | 120  | 3  | 1    | 34   |
| NT5C2  | NM_012229 | 10 | 104,899,153 | 104,899,246 | 93   | 4  | 35   | 58   |
| NT5C2  | NM_012229 | 10 | 104,866,336 | 104,866,473 | 137  | 5  | 59   | 97   |
| NT5C2  | NM_012229 | 10 | 104,865,453 | 104,865,568 | 115  | 6  | 98   | 130  |
| NT5C2  | NM_012229 | 10 | 104,860,982 | 104,861,093 | 111  | 7  | 131  | 160  |
| NT5C2  | NM_012229 | 10 | 104,860,792 | 104,860,869 | 77   | 8  | 161  | 179  |
| NT5C2  | NM_012229 | 10 | 104,859,673 | 104,859,786 | 113  | 9  | 180  | 211  |
| PAX5   | NM_016734 | 9  | 37,033,973  | 37,034,038  | 65   | 1  | 1    | 16   |
| PAX5   | NM_016734 | 9  | 36,840,547  | 36,840,643  | 96   | 10 | 368  | 392  |
| PAX5   | NM_016734 | 9  | 37,020,623  | 37,020,808  | 185  | 2  | 17   | 71   |
| PAX5   | NM_016734 | 9  | 37,014,984  | 37,015,201  | 217  | 3  | 72   | 137  |
| PAX5   | NM_016734 | 9  | 37,006,460  | 37,006,544  | 84   | 4  | 138  | 159  |
| PAX5   | NM_016734 | 9  | 37,002,635  | 37,002,783  | 148  | 5  | 160  | 202  |
| PAX5   | NM_016734 | 9  | 36,966,536  | 36,966,731  | 195  | 6  | 203  | 260  |
| PAX5   | NM_016734 | 9  | 36,923,342  | 36,923,491  | 149  | 7  | 261  | 303  |
| PAX5   | NM_016734 | 9  | 36,881,991  | 36,882,112  | 121  | 8  | 304  | 338  |
| PAX5   | NM_016734 | 9  | 36,846,830  | 36,846,936  | 106  | 9  | 339  | 367  |

|               |           |    |             |             |      |       |      |      |
|---------------|-----------|----|-------------|-------------|------|-------|------|------|
| <i>PHF6</i>   | NM_032458 | X  | 133,559,221 | 133,559,370 | 149  | 10    | 324  | 366  |
| <i>PHF6</i>   | NM_032458 | X  | 133,511,638 | 133,511,795 | 157  | 2     | 1    | 46   |
| <i>PHF6</i>   | NM_032458 | X  | 133,512,025 | 133,512,146 | 121  | 3     | 47   | 80   |
| <i>PHF6</i>   | NM_032458 | X  | 133,527,521 | 133,527,674 | 153  | 4     | 81   | 124  |
| <i>PHF6</i>   | NM_032458 | X  | 133,527,929 | 133,527,992 | 63   | 5     | 125  | 139  |
| <i>PHF6</i>   | NM_032458 | X  | 133,547,511 | 133,547,697 | 186  | 6     | 140  | 196  |
| <i>PHF6</i>   | NM_032458 | X  | 133,547,843 | 133,548,006 | 163  | 7     | 197  | 244  |
| <i>PHF6</i>   | NM_032458 | X  | 133,549,036 | 133,549,160 | 124  | 8     | 245  | 278  |
| <i>PHF6</i>   | NM_032458 | X  | 133,551,189 | 133,551,342 | 153  | 9     | 279  | 323  |
| <i>PTEN</i>   | NM_000314 | 10 | 89,624,217  | 89,624,315  | 98   | 1     | 1    | 27   |
| <i>PTEN</i>   | NM_000314 | 10 | 89,653,772  | 89,653,876  | 104  | 2     | 28   | 55   |
| <i>PTEN</i>   | NM_000314 | 10 | 89,685,260  | 89,685,324  | 64   | 3     | 56   | 70   |
| <i>PTEN</i>   | NM_000314 | 10 | 89,690,793  | 89,690,856  | 63   | 4     | 71   | 85   |
| <i>PTEN</i>   | NM_000314 | 10 | 89,692,760  | 89,693,018  | 258  | 5     | 86   | 164  |
| <i>PTEN</i>   | NM_000314 | 10 | 89,711,865  | 89,712,026  | 161  | 6     | 165  | 212  |
| <i>PTEN</i>   | NM_000314 | 10 | 89,717,600  | 89,717,786  | 186  | 7     | 213  | 267  |
| <i>PTEN</i>   | NM_000314 | 10 | 89,720,641  | 89,720,885  | 244  | 8     | 268  | 342  |
| <i>PTEN</i>   | NM_000314 | 10 | 89,725,034  | 89,725,239  | 205  | 9     | 343  | 404  |
| <i>PTPN11</i> | NM_002834 | 12 | 112,926,818 | 112,926,989 | 171  | 13    | 483  | 553  |
| <i>PTPN11</i> | NM_002834 | 12 | 112,888,102 | 112,888,326 | 224  | 3     | 47   | 111  |
| <i>RPL10</i>  | NM_006013 | X  | 153,628,132 | 153,628,292 | 160  | 5     | 64   | 110  |
| <i>RPL10</i>  | NM_006013 | X  | 153,628,795 | 153,628,977 | 182  | 6     | 111  | 164  |
| <i>RPL5</i>   | NM_000969 | 1  | 93,298,936  | 93,299,025  | 89   | 2     | 2    | 25   |
| <i>RPL5</i>   | NM_000969 | 1  | 93,299,092  | 93,299,227  | 135  | 3     | 26   | 63   |
| <i>RPL5</i>   | NM_000969 | 1  | 93,300,326  | 93,300,480  | 154  | 4     | 64   | 108  |
| <i>RPL5</i>   | NM_000969 | 1  | 93,301,737  | 93,301,959  | 222  | 5     | 109  | 176  |
| <i>RPL5</i>   | NM_000969 | 1  | 93,303,003  | 93,303,200  | 197  | 6     | 177  | 235  |
| <i>RPL5</i>   | NM_000969 | 1  | 93,306,098  | 93,306,206  | 108  | 7     | 236  | 265  |
| <i>RPL5</i>   | NM_000969 | 1  | 93,307,313  | 93,307,433  | 120  | 8     | 266  | 298  |
| <i>RUNX1</i>  | NM_001754 | 21 | 36421129    | 36,421,206  | 77   | 2     | 1    | 19   |
| <i>RUNX1</i>  | NM_001754 | 21 | 36,265,212  | 36,265,269  | 57   | 3     | 20   | 31   |
| <i>RUNX1</i>  | NM_001754 | 21 | 36,259,130  | 36,259,419  | 289  | 4     | 33   | 117  |
| <i>RUNX1</i>  | NM_001754 | 21 | 36,252,844  | 36,253,020  | 176  | 5     | 118  | 169  |
| <i>RUNX1</i>  | NM_001754 | 21 | 36231761    | 36,231,885  | 124  | 6     | 170  | 204  |
| <i>RUNX1</i>  | NM_001754 | 21 | 36206697    | 36206908    | 211  | 7     | 205  | 268  |
| <i>RUNX1</i>  | NM_001754 | 21 | 36,171,588  | 36,171,769  | 181  | 8     | 269  | 322  |
| <i>RUNX1</i>  | NM_001754 | 21 | 36164422    | 36164917    | 495  | 9     | 323  | 481  |
| <i>SETBP1</i> | NM_015559 | 18 | 42,531,813  | 42,532,074  | 261  | 5     | 840  | 920  |
| <i>TERC</i>   | NR_001566 | 3  | 169,482,388 | 169,482,858 | 470  | ncRNA |      |      |
| <i>TERT</i>   | NM_198253 | 5  | 1,294,876   | 1,295,114   | 238  | 1     | 1    | 73   |
| <i>TERT</i>   | NM_198253 | 5  | 1,266,569   | 1,266,660   | 91   | 10    | 861  | 885  |
| <i>TERT</i>   | NM_198253 | 5  | 1,264,509   | 1,264,717   | 208  | 11    | 886  | 948  |
| <i>TERT</i>   | NM_198253 | 5  | 1,260,579   | 1,260,725   | 146  | 12    | 949  | 990  |
| <i>TERT</i>   | NM_198253 | 5  | 1,258,703   | 1,258,784   | 81   | 13    | 991  | 1010 |
| <i>TERT</i>   | NM_198253 | 5  | 1,255,392   | 1,255,536   | 144  | 14    | 1011 | 1052 |
| <i>TERT</i>   | NM_198253 | 5  | 1,254,473   | 1,254,630   | 157  | 15    | 1053 | 1098 |
| <i>TERT</i>   | NM_198253 | 5  | 1,253,833   | 1,253,956   | 123  | 16    | 1099 | 1133 |
| <i>TERT</i>   | NM_198253 | 5  | 1,293,418   | 1,294,791   | 1373 | 2     | 74   | 524  |
| <i>TERT</i>   | NM_198253 | 5  | 1,282,534   | 1,282,749   | 215  | 3     | 525  | 589  |

|        |            |    |             |             |      |    |      |      |
|--------|------------|----|-------------|-------------|------|----|------|------|
| TERT   | NM_198253  | 5  | 1,280,263   | 1,280,463   | 200  | 4  | 590  | 650  |
| TERT   | NM_198253  | 5  | 1,279,396   | 1,279,595   | 199  | 5  | 651  | 710  |
| TERT   | NM_198253  | 5  | 1,278,746   | 1,278,921   | 175  | 6  | 711  | 762  |
| TERT   | NM_198253  | 5  | 1,272,290   | 1,272,405   | 115  | 7  | 763  | 794  |
| TERT   | NM_198253  | 5  | 1,271,224   | 1,271,329   | 105  | 8  | 795  | 823  |
| TERT   | NM_198253  | 5  | 1,268,625   | 1,268,758   | 133  | 9  | 824  | 860  |
| TET2   | NM_1127208 | 4  | 106,193,711 | 106,194,085 | 374  | 10 | 1395 | 1513 |
| TET2   | NM_1127208 | 4  | 106,196,195 | 106,197,686 | 1491 | 11 | 1514 | 2002 |
| TET2   | NM_1127208 | 4  | 106155054   | 106158519   | 3465 | 3  | 1    | 1137 |
| TET2   | NM_1127208 | 4  | 106,162,486 | 106,162,596 | 110  | 4  | 1138 | 1167 |
| TET2   | NM_1127208 | 4  | 106,163,981 | 106,164,094 | 113  | 5  | 1168 | 1198 |
| TET2   | NM_1127208 | 4  | 106,164,717 | 106,164,945 | 228  | 6  | 1199 | 1268 |
| TET2   | NM_1127208 | 4  | 106,180,766 | 106,180,936 | 170  | 7  | 1269 | 1318 |
| TET2   | NM_1127208 | 4  | 106,182,906 | 106,183,015 | 109  | 8  | 1319 | 1348 |
| TET2   | NM_1127208 | 4  | 106,190,757 | 106,190,914 | 157  | 9  | 1349 | 1394 |
| TP53   | NM_000546  | 17 | 7,573,917   | 7,574,043   | 126  | 10 | 332  | 367  |
| TP53   | NM_000546  | 17 | 7,572,917   | 7,573,018   | 101  | 11 | 368  | 364  |
| TP53   | NM_000546  | 17 | 7,579,829   | 7,579,922   | 93   | 2  | 1    | 25   |
| TP53   | NM_000546  | 17 | 7,579,690   | 7,579,731   | 41   | 3  | 26   | 32   |
| TP53   | NM_000546  | 17 | 7,579,302   | 7,579,600   | 298  | 4  | 33   | 125  |
| TP53   | NM_000546  | 17 | 7,578,361   | 7,578,564   | 203  | 5  | 126  | 186  |
| TP53   | NM_000546  | 17 | 7,578,167   | 7,578,299   | 132  | 6  | 187  | 224  |
| TP53   | NM_000546  | 17 | 7,577,489   | 7,577,618   | 129  | 7  | 225  | 260  |
| TP53   | NM_000546  | 17 | 7,577,009   | 7,577,165   | 156  | 8  | 261  | 306  |
| TP53   | NM_000546  | 17 | 7,576,843   | 7,576,936   | 93   | 9  | 307  | 331  |
| VPREB1 | NM_007128  | 22 | 22,599,216  | 22,599,281  | 65   | 1  | 1    | 16   |
| VPREB1 | NM_007128  | 22 | 22,599,348  | 22,599,759  | 411  | 2  | 17   | 146  |
| WT1    | NM_024426  | 11 | 32456236    | 32456901    | 665  | 1  | 1    | 215  |
| WT1    | NM_024426  | 11 | 32410594    | 32410735    | 141  | 10 | 479  | 519  |
| WT1    | NM_024426  | 11 | 32450033    | 32450175    | 142  | 2  | 216  | 256  |
| WT1    | NM_024426  | 11 | 32449492    | 32,449,614  | 122  | 3  | 257  | 291  |
| WT1    | NM_024426  | 11 | 32439113    | 32439210    | 97   | 4  | 292  | 316  |
| WT1    | NM_024426  | 11 | 32438026    | 32438096    | 70   | 5  | 317  | 334  |
| WT1    | NM_024426  | 11 | 32421484    | 32421600    | 116  | 6  | 335  | 366  |
| WT1    | NM_024426  | 11 | 32417793    | 32417963    | 170  | 7  | 367  | 416  |
| WT1    | NM_024426  | 11 | 32414202    | 32414311    | 109  | 8  | 417  | 446  |
| WT1    | NM_024426  | 11 | 32413508    | 32413620    | 112  | 9  | 447  | 478  |

*Abbreviations:*

*Chr, chromosome; BP, base pairs; AA, amino acid  
GRCh37/hg19*
